# Supplementary material for: Synthesis, radical scavenging activity and structure–activity relationship of uric acid analogs
Source: Royal Society of Chemistry journal article supplement (doi:10.1039/c2md20287e), 2012-12-20
Supplement: c2md20287e.pdf [file c2md20287e.pdf]

## Supplementary Information

### Synthesis, Radical Scavenging Activity and Structure-Activity Relationship of Uric Acid Analogs.

Daisuke Yasuda,<sup>a</sup> Kyoko Takahashi,<sup>a</sup> Tomohiro Kakinoki,<sup>a</sup> Yoko Tanaka,<sup>a</sup> Tomoyuki Ohe, Shigeo Nakamura<sup>b</sup> and Tadahiko Mashino<sup>\*a</sup>

#### Contents

1. Preparation of Uric acid analogs
2. Scanned copies of the <sup>1</sup>H and <sup>13</sup>C NMR spectra
3. DPPH radical scavenging activity
4. Prediction of pK<sub>a</sub> values
5. Determination of cytotoxicity.

#### 1. Preparation of Uric acid analogs

##### 1.1. General

<sup>1</sup>H-NMR spectra (500 MHz) were measured on a JEOL JNM-A500 FT-NMR spectrometer with tetramethylsilane as an internal standard ( $\delta = 0.00$ ) in CD<sub>3</sub>OD or DMSO-*d*<sub>6</sub>. <sup>13</sup>C-NMR spectra (125 MHz) were obtained on the same spectrometer and the chemical shifts were referenced to the signals of CD<sub>3</sub>OD ( $\delta = 33.3$ ) or DMSO-*d*<sub>6</sub> ( $\delta = 39.5$ ). Melting points were determined using a Yanagimoto MP-J3 micro-melting point apparatus and uncorrected. Column chromatography was performed using Merck Silica gel 60. 6-Hydroxy-2-benzoxazolinone **4**, 5-indanol **7** were purchased from Sigma-Aldrich Chemical Co., 5-hydroxyoxindole **3a** was purchased from Apin Chemical Co. 5-hydroxyindole **5**, 6-hydroxyindole **6**, Benzimidazole **8** and 2-indanone **9** were purchased from Kanto Chemical Co., 1,1-diphenyl-2-picrylhydrazyl, hydroquinone, *p*-aminophenol and uric acid were purchased from Tokyo Kasei Kogyo Co. The regioisomers of **2a** and **3a** were synthesized according to the method reported by R. J. S. Beer *et al* (*J. chem. Soc.*, **1948**, 1605-1609) with some suitable modification.

##### 1-2 Preparation of 1,3-dihydro-7-methoxy-2H-imidazo[4,5-b]pyridine-2-one (**1b**)

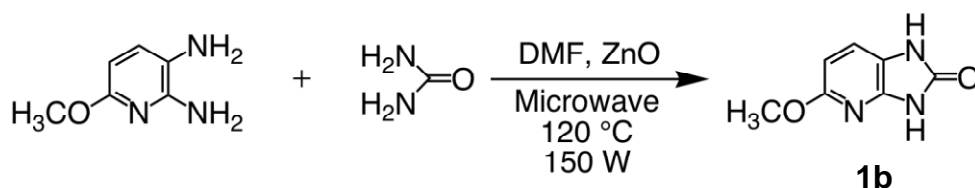

To solution of urea (0.45 g, 7.5 mmol) and *o*-6-methoxy-2,3-pyridinediamine (1.59 g, 7.5 mmol) in *N,N*-dimethylformamide (12 mL) was added ZnO (442.5 mg, 5.44 mmol) and reacted for 5 hr under microwave irradiation condition (120°C, 150 W). Whole the reaction mixture was diluted with H<sub>2</sub>O, extracted with ethyl acetate twice. The organic layer was washed with sat. NaCl solution, dried over anhydrous MgSO<sub>4</sub>, and concentrated under reduced pressure. The residue was recrystallized from CHCl<sub>3</sub>: MeOH to brown crystal (459.5 mg, 37 %).

**<sup>1</sup>H-NMR (DMSO-*d*<sub>6</sub>, 500 MHz)** δ 3.78 (*s*, 3H, -OCH<sub>3</sub>), 6.36 (*d*, 1H, *J* = 8.50 Hz, 8-H), 7.21 (*d*, 1H, *J* = 8.00 Hz, 9-H), 10.54 (*brs*, 1H, -NH-), 11.20 (*brs*, 1H, -NH-).

**<sup>13</sup>C-NMR (DMSO-*d*<sub>6</sub>, 125 MHz)** δ 53 (-OCH<sub>3</sub>), 101 (8C), 117 (4C), 119 (9C), 142 (5C), 154 (7C), 159 (2C).

**FAB-MS:** *m/z*=166 [M+H]<sup>+</sup> (84 %), 165 [M]<sup>+</sup> (64 %), 138 (40 %), 137 (77 %), 136 (100 %), 107 (29 %), 89 (24 %), 77 (21 %).

**FAB-HRMS:** calcd. for C<sub>7</sub>H<sub>8</sub>N<sub>3</sub>O<sub>2</sub> 166.0617, found 166.0633.

### 1-3. Preparation of 5-methoxy-2-benzimidazolinone **2b**

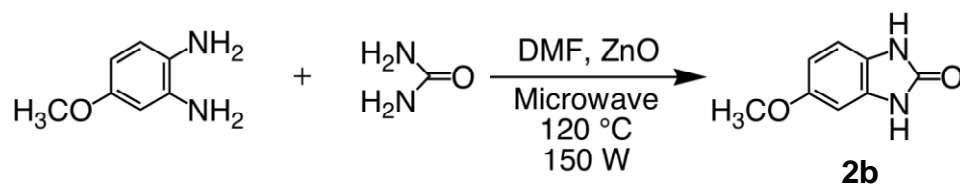

To solution of urea (0.55 g, 9.19 mmol) and 4-methoxy-1,2-phenylenediamine (1.94 g, 9.19 mmol) in *N,N*-dimethylformamide (20 mL) was added ZnO (540.0 mg, 6.63 mmol) and reacted for 10 hr under microwave irradiation condition (120°C, 150 W). Whole the reaction mixture was diluted with H<sub>2</sub>O, extracted with ethyl acetate twice. The organic layer was washed with sat. NaCl solution, dried over anhydrous MgSO<sub>4</sub>, and concentrated under reduced pressure. The residue was recrystallized from CHCl<sub>3</sub>: MeOH to give yellow crystal (560 mg, 37 %).

**<sup>1</sup>H-NMR (CD<sub>3</sub>OD, 500 MHz)** δ 3.69 (*s*, 3H, -OCH<sub>3</sub>), 6.55 (*dd*, 1H, *J* = 8.50 Hz, 2.14 Hz, 6-H), 6.59 (*d*, 1H, *J* = 2.14 Hz, 4-H), 6.85 (*d*, 1H, *J* = 8.54 Hz, 7-H).

**<sup>13</sup>C-NMR (CD<sub>3</sub>OD, 125 MHz)** δ 56 (-OCH<sub>3</sub>), 108 (4C), 110 (6C), 124 (7C), 131 (9C), 157 (5C), 158

(2C).

#### 1-4. Preparation of 2-benzimidazolinone **2c**

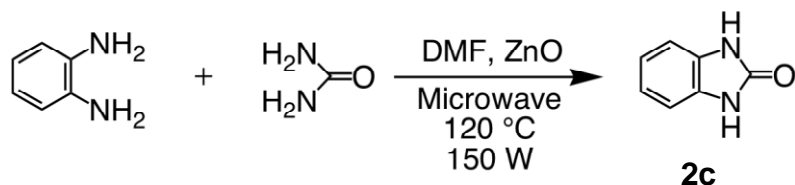

To solution of urea (0.20 g, 3.33 mmol) and *o*-phenylenediamine (0.36 g, 3.33 mmol) in *N,N*-dimethylformamide (8 mL) was added ZnO (196.7 mg, 2.42 mmol) and reacted for 6 hr under microwave irradiation condition (120°C, 150 W). Whole the reaction mixture was diluted with H<sub>2</sub>O, extracted with ethyl acetate twice. The organic layer was washed with sat. NaCl solution, dried over anhydrous MgSO<sub>4</sub>, and concentrated under reduced pressure. The residue was recrystallized from CH<sub>2</sub>Cl<sub>2</sub>: MeOH to give black crystal (37.3 mg, 8 %).

<sup>1</sup>H-NMR (CD<sub>3</sub>OD, 600 MHz) δ 7.01 (s, 4H, 4,5,6,7-H).

<sup>13</sup>C-NMR (CD<sub>3</sub>OD, 125 MHz) δ 110 (5C, 6C), 122 (4C, 7C), 130 (8C, 9C), 158 (2C).

#### 1-5 Preparation of 1,3-dihydro-7-hydroxy-2H-imidazo[4,5-b]pyridine-2-one (**1a**)

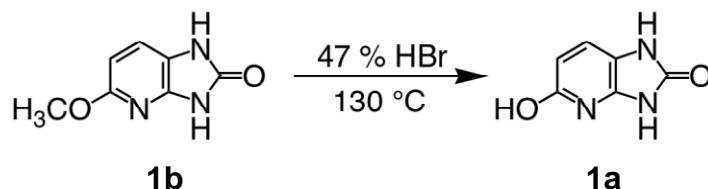

**1b** (100.0 mg, 0.61 mmol) was dissolved in 47 % aqueous HBr (1.0 mL) and stirred at 130 °C for 3 hr. After excess HBr and H<sub>2</sub>O were removed by evaporation, the crude product (101.2 mg) was purified by column chromatography (SiO<sub>2</sub>) to give white solid (10.0 mg, 11%).

<sup>1</sup>H-NMR (DMSO-*d*<sub>6</sub>, 500MHz) δ 6.17 (*d*, 1H, *J* = 8.30 Hz, 7-H), 7.11 (*d*, 1H, *J* = 8.06 Hz, 8-H), 10.04 (*brs*, 1H, -OH), 10.40 (*s*, 1H, -NH-), 11.02 (*s*, 1H, -NH-).

<sup>13</sup>C-NMR (DMSO-*d*<sub>6</sub>, 125 MHz) δ 100 (8C), 116 (4C), 118 (9C), 142 (5C), 154 (7C), 158 (2C).

**FAB-MS**: *m/z*=152 [M+H]<sup>+</sup> (39 %), 151 [M]<sup>+</sup> (19 %), 138 (39 %), 137 (76 %), 136 (100 %), 107 (28 %), 89 (25 %), 77 (21 %).

**FAB-HRMS**: calcd. for C<sub>6</sub>H<sub>6</sub>N<sub>3</sub>O<sub>2</sub> 152.0460, found 152.0472.

Mp. : over 300 °C (decomp.)

1-6. Preparation of 5-hydroxy-2-benzimidazolinone **2a**

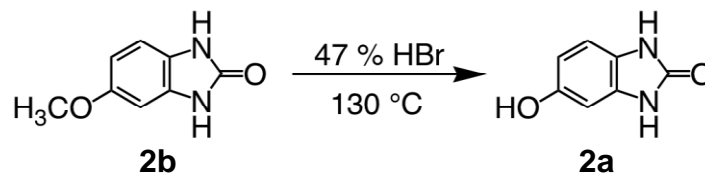

**2b** (80.6 mg, 0.49 mmol) was dissolved in 47 % aqueous HBr (1.0 mL) and stirred at 130 °C for 3 hr. After excess HBr and H<sub>2</sub>O were removed by evaporation, the crude product (81.5 mg) was purified by column chromatography (SiO<sub>2</sub>) to give white solid (65.6 mg, 89 %).

<sup>1</sup>H-NMR (CD<sub>3</sub>OD, 500 MHz) δ 6.49 (*dd*, 1H, *J* = 8.50 Hz, 2.14 Hz, 6-H), 6.53 (*d*, 1H, *J* = 1.83, 4-H), 6.83 (*d*, 1H, *J* = 8.28 Hz, 7-H).

<sup>13</sup>C-NMR (CD<sub>3</sub>OD, 125 MHz) δ 98 (4C), 109 (6C), 110 (1C), 123 (7C), 131 (3C), 153 (5C), 158 (2C).

M. p. : over 300 °C (decomp.)

2. Scanned copies of the <sup>1</sup>H and <sup>13</sup>C NMR spectra

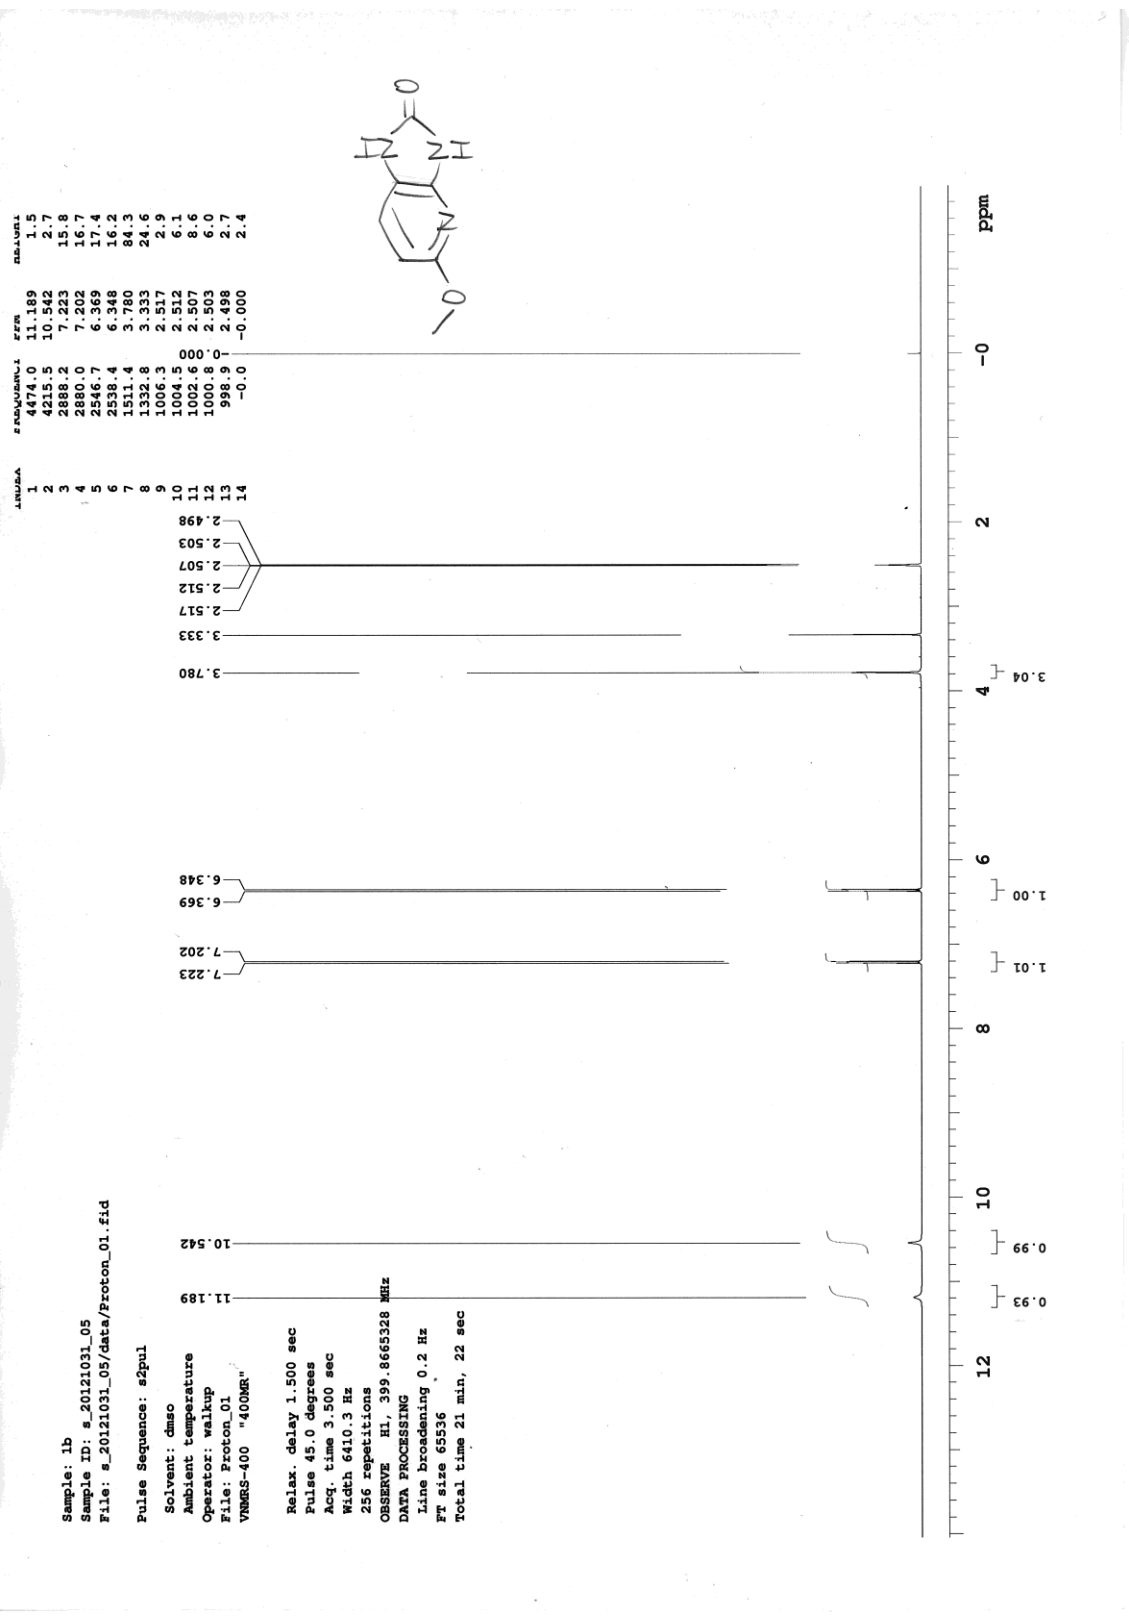

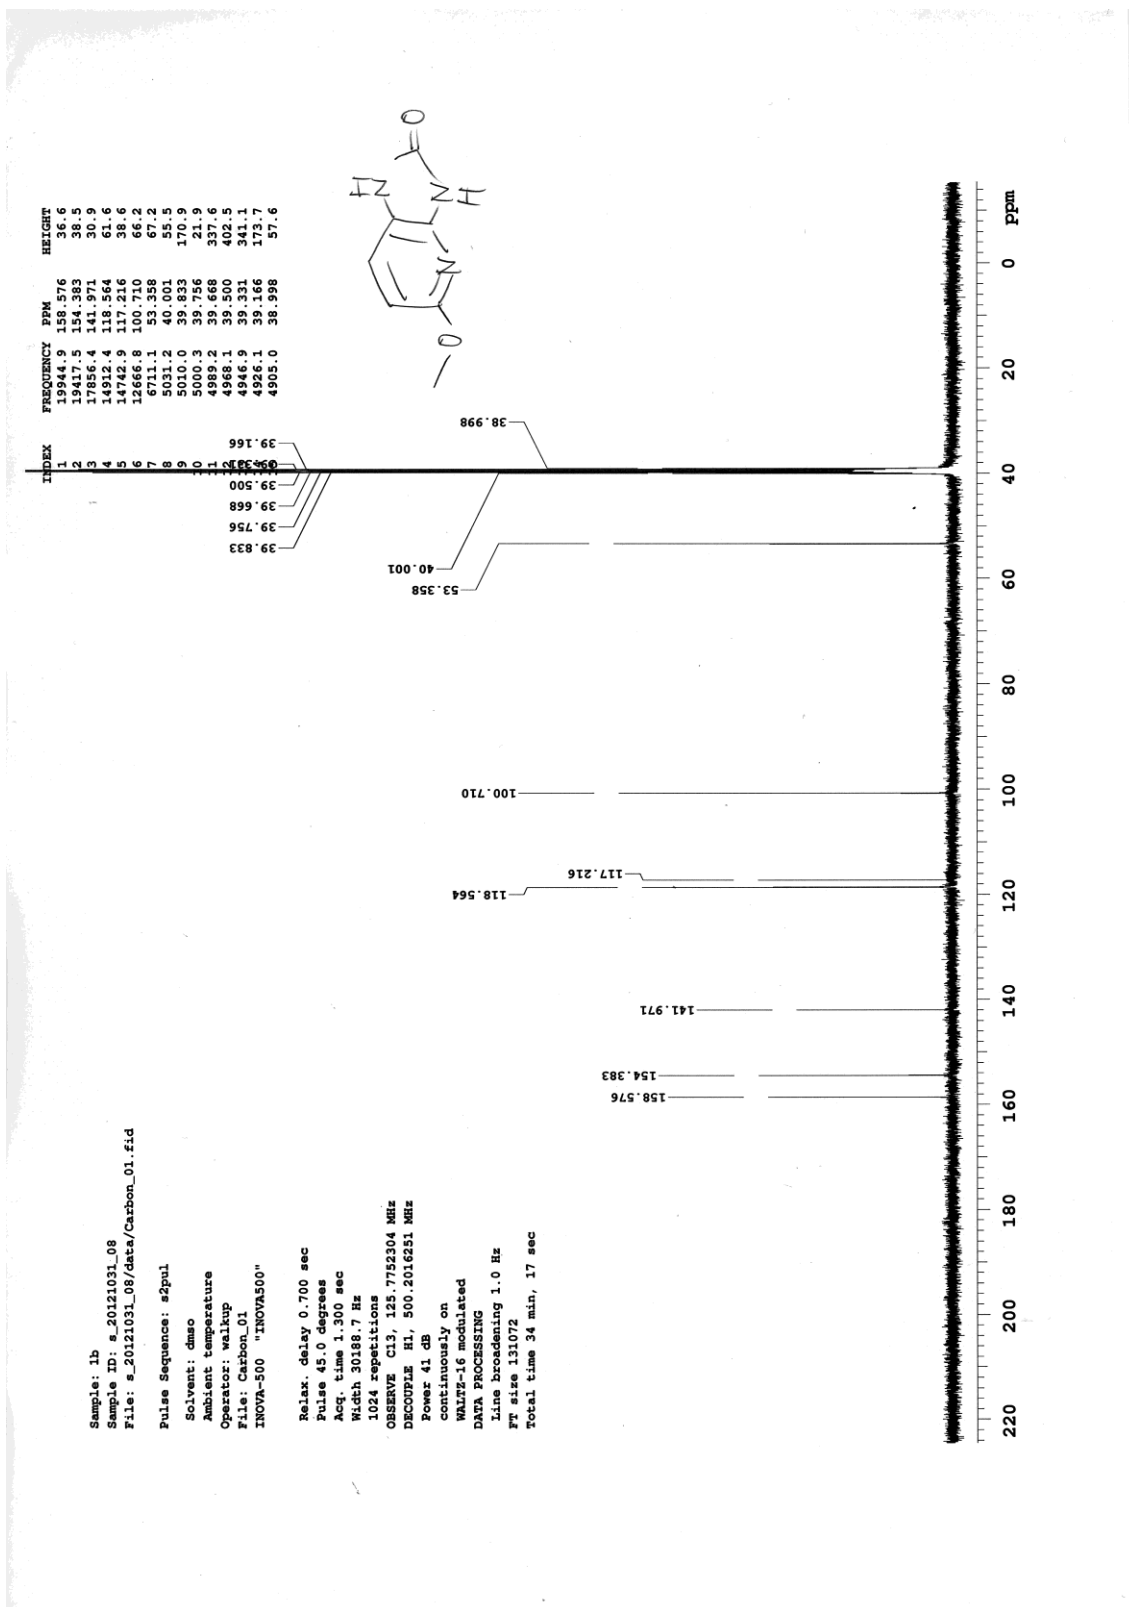

| INDEX | FREQUENCY | PPM    | HEIGHT |
|-------|-----------|--------|--------|
| 1     | 5510.5    | 11.017 | 41.8   |
| 2     | 5203.3    | 10.402 | 45.2   |
| 3     | 5024.2    | 10.044 | 12.2   |
| 4     | 3562.0    | 7.121  | 57.9   |
| 5     | 3553.9    | 7.105  | 59.5   |
| 6     | 3090.6    | 6.179  | 85.7   |
| 7     | 3082.3    | 6.162  | 80.3   |
| 8     | 1256.9    | 2.513  | 25.7   |
| 9     | 1255.1    | 2.509  | 33.8   |
| 10    | 1253.4    | 2.506  | 26.4   |

Sample: 1a  
Sample ID: s\_20121031\_07  
File: s\_20121031\_07\data\Proton\_01.fid

Pulse Sequence: s2pul  
Solvent: dms0  
Ambient temperature  
Operator: walkup  
File: Proton\_01  
INOVA-500 "INOVA500"

Relax delay 1.500 sec  
Pulse 45.0 degrees  
Acq. time 3.500 sec  
Width 8003.2 Hz  
128 repetitions  
OBSERVE H1, 500.1991121 MHz  
DATA PROCESSING  
Line broadening 0.3 Hz  
FT size 65536  
Total time 10 min, 41 sec

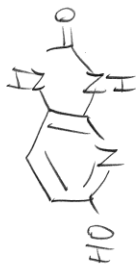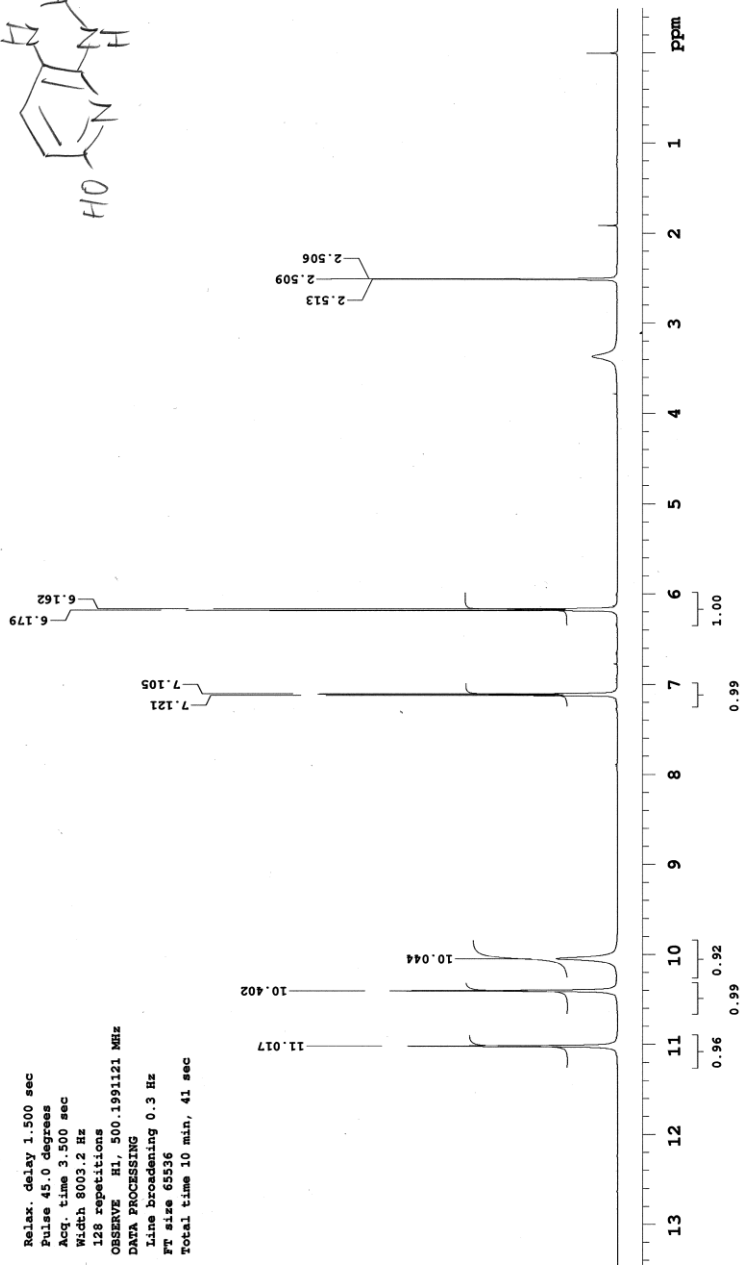

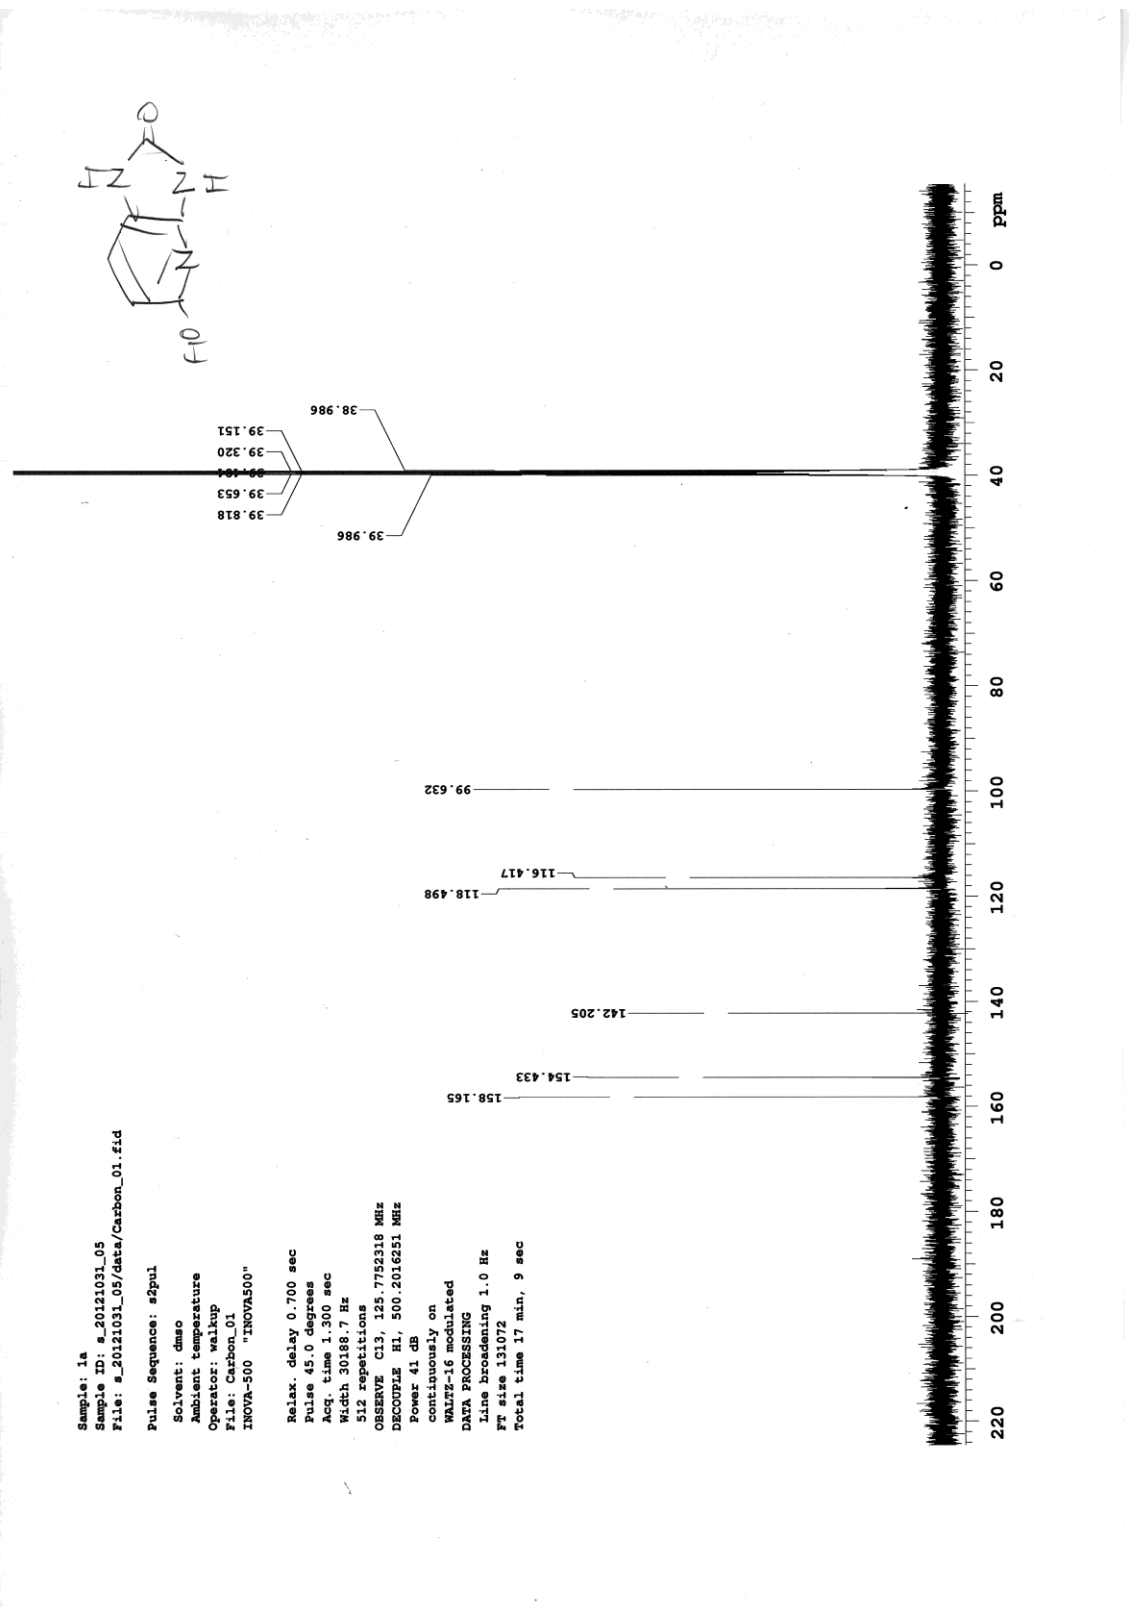



### 3. DPPH radical scavenging activity

The measurement procedure is a modification of the method of Yamaji *et al* (Yamaji, K.; Sarker, K. P.; Maruyama, I.; Hizukuri, S. *Planta Med.*, **2002**, *60*, 16). Sample (500  $\mu\text{M}$ ) and DPPH (50  $\mu\text{M}$ ) was mixed in a solution of MES buffer (pH 7.4) and ethanol (3:2) at 25 °C. The decrease in absorbance at 517 nm was recorded on a stopped-flow Rapid-Scan Spectrophotometer RSP-1000 (UNISOKU Co., Ltd.) for 60 sec. The second-order rate constant was calculated based on a decreasing curve fitting method (UNISOKU Spectroscopy & Kinetics, NISOKU Co., Ltd.).

### 4. Prediction of pKa values

Apparent pKa values of all UA analogs were theoretically calculated by using ACD/pKa DB (version 9.0) software.

### 4. Determination of cytotoxicity.

HL-60 cells ( $5 \times 10^5$  cells/mL) were plated onto a six-well multi-plate and incubated with the test compound in DMSO (0.5-100  $\mu\text{M}$ ) at 37 °C for 24 h under a 5% CO<sub>2</sub> atmosphere. Only the cells treated with DMSO were used as a non-treated control. The concentration of DMSO was set at 1 v/v %. The incubation mixture was centrifuged at 1,000 rpm for 5 min, and the pellet was suspended in 2 mL of PBS(-). The cells were stained with trypan blue, and the viable cells were counted by a Vi-CELL™ cell viability analyzer (Beckman Coulter Inc.). Cell viability was calculated by the following equation. Cell Viability (%) = (treated viable cells)/(non-treated control viable cells) x 100.
